# Alterations in gamma frequency oscillations correlate with cortical tau deposition in Alzheimer's disease

Umberto Nench a<sup>a,c,#</sup>; Isotta Rigoni PhD<sup>b,#</sup>; Federica Ribaldi PhD<sup>a,c</sup>; Daniele Altomare PhD<sup>a,c,d,e</sup>; Margitta Seeck<sup>b</sup>; Valentina Garibotto<sup>f</sup>; Serge Vulliémoz<sup>b</sup>; Giovanni B. Frisoni<sup>a,c</sup>.

a. Geneva Memory Center, Division of Geriatrics, Department of Rehabilitation and Geriatrics, Geneva University Hospitals, Geneva, Switzerland.

b. EEG and Epilepsy Unit, Division of Neurology, Department of Clinical Neurosciences, University Hospitals and Faculty of Medicine of University of Geneva, Geneva, Switzerland.

c. Laboratory of Neuroimaging of Aging (LANVIE), University of Geneva, Geneva, Switzerland.

d. Neurology Unit, Department of Clinical and Experimental Sciences, University of Brescia, Brescia, Italy.

e. Neurology Unit, ASST Spedali Civili, Brescia, Italy.

f. Division of Nuclear Medicine and molecular imaging, Department of Diagnostics, Geneva University Hospitals, Geneva, Switzerland; NIMTLab, Faculty of Medicine, University of Geneva, Geneva, Switzerland; Center for Biomedical Imaging (CIBM), Geneva, Switzerland

#: U. Nench and I. Rigoni share equal contributions.

Corresponding author: Dr Umberto Nench, Centre de la Mémoire, Service de Gériatrie, Département de Gériatrie et Réadaptation, Hôpitaux Universitaires de Genève, rue Gabrielle Perret-Gentil 6, 1205 Genève, Switzerland.

E-mail : [umne@hcuge.ch](mailto:umne@hcuge.ch)

## Abstract

We assessed the relationship of gamma oscillations with tau deposition in Alzheimer's disease (AD) and other cognitive diseases, as both are altered during the disease course and relate to neurodegeneration. We retrospectively analyzed data from 7 AD, tau positive patients and 9 tau negative patients, that underwent amyloid PET, and cerebral tau PET and EEG within 12 months. Relative gamma power was higher in tau positive (AD) patients than in tau negative patients ( $p < .05$ ) and tau burden was associated with a linear increase in gamma power ( $p < .001$ ), while no association was present with amyloid- $\beta$  burden. Thus, increase in the gamma power might represent a novel biomarker for tau driven neurodegeneration.

**Keywords:** Alzheimer's disease; tau; PET; gamma oscillations; EEG.

**Abbreviations:** AD, Alzheimer's disease; PET, positron emission tomography; SUVR, standard uptake value ratio; EEG, electroencephalography; A $\beta$ 42, amyloid-beta 42.

## 1. Introduction

Alzheimer's Disease (AD) is the most prevalent cause of dementia worldwide (Anon 2021) and its prevalence is expected to increase during the next years. The hallmarks of AD are progressive amyloid- $\beta$  (A $\beta$ ) plaques and neurofibrillary tangles (tau) deposition, and the latter correlates with clinical symptoms, disease severity and speed of progression (Digma et al. 2019; Pontecorvo et al. 2017). Currently, the only way to assess in-vivo tau deposition is through either lumbar puncture or tau PET. In AD, gamma oscillations ( $>30$ Hz) show early alterations in the disease course (Verret et al. 2013; Wang et al. 2017). Here, we explored the alterations in the gamma band as proxies of cortical tau deposition in a memory clinic population.

## 2. Methods

**2.1 Patients:** We analyzed data of 7 AD patients with significant amyloid and tau deposition and 9 patients with either a subjective cognitive decline or objective cognitive deficits without tau deposition from the Geneva Memory Center. We included patients who underwent cerebral tau PET and a low-

density resting-state EEG within 12 months. This study was approved by the local ethic committee and has been conducted in accordance with the principles of the Declaration of Helsinki (PB\_2016-01382 (15-206)).

**2.3 EEG acquisition and analysis:** We selected 5 minutes of the clinical low-density resting state EEG (eyes-opened, 25-channel, sampling rate = 256 Hz). The signal was band-pass filtered ([1-100 Hz]) and notch-filtered at 50 and 100 Hz. Sensors with poor signal-to-noise ratio were removed and interpolated. Independent component analysis and further visual inspection was performed to remove eye blinks and muscle artifacts, after which data were re-referenced to the average. The remaining signal was cropped into epochs of 1 second without overlap (Table 1). The power spectral density was calculated using a single Hanning taper and, for each EEG channel, the relative power in gamma band was defined as the percentage of the power between 30-98 Hz with respect to the total power. For statistical analyses, we used both the relative gamma power calculated for each channel and also averaged over the 25 sensors. EEG analyses were carried out in Matlab.

**2.4 PET images acquisition and analysis:** PET images were realized using a Siemens Biograph mCT or Vision PET scanner. Cerebral tau-PET images were acquired using  $^{18}\text{F}$ -Flortaucipir and amyloid-PET images were acquired using  $^{18}\text{F}$ -Flutemetamol (N=14) or  $^{18}\text{F}$ -Florbetapir (N=2). Global tau-PET SUVR was computed as previously described (Mishra et al. 2017), while tau and amyloid status (positive or negative) were assessed visually by an expert nuclear medicine physician (GV) following validated recommendations (Fleisher et al. 2020).

**2.6 Statistical Analyses:** Demographical and clinical data across tau-positive (tau-P) and tau-negative (tau-N) patients were assessed using Mann-Whitney U and Chi-squared test for continuous and categorical variables, respectively. The relative gamma power (averaged over electrodes) was compared with a two-sided Mann-Whitney U-test, and the result was used to define the directionality of a one-sided cluster-based permutation test (Fieldtrip, 2000 permutations). The latter was used to identify clusters of electrodes that, across tau-P patients, showed a greater level of relative gamma power than the tau-N ones. We excluded P9 and P10 as their projections are not described in

Okamoto et al. and ran local correlations for the remaining 13 electrodes. For Fz, Cz and Pz, we used the average gamma power of each preponderant cortical area for each hemisphere (e.g. F3/F4 for Fz). We repeated these analyses also for the delta [1-3 Hz], theta [4-7 Hz], alpha [8-12 Hz] and beta [13-29 Hz] bands. Values of relative gamma power were then used for correlation analyses, using a Spearman or a Pearson Correlation Coefficient. For each group (tau-P: N=7; tau-N: N=9) we did the following analyses. 1) We investigated the relationship of average relative gamma power with the global tau-PET SUVR and the amyloid-PET centiloid. 2) For electrodes belonging to the significant cluster, we correlated the local relative gamma power with the SUVR of the region of interest underlying the electrode placement, according to published guidelines (Okamoto et al. 2004). The reported p-values are Bonferroni corrected for the number of electrodes tested.

### 3. Results

Of the 16 selected patients, 7 had a significant cortical tau deposition (i.e. tau-P), while 9 did not (i.e. tau-N). All tau-P patients also showed amyloid deposition on cerebral amyloid-PET, confirming the presence of AD pathology. Among tau-N patients, only one showed amyloid deposition on amyloid-PET. Demographic data and patients' characteristics are summarized in Table 1.

**3.1 Gamma oscillations are increased in presence of cortical tau deposition, but not in the presence of amyloid.** The average relative gamma power was higher in tau-P than in tau-N patients ( $p=.042$ , Fig 1A). Correlation analyses revealed a strong positive correlation between the average gamma power and tau PET SUVR in tau-P patients ( $\rho_{\text{Pearson}}=0.88$ ,  $p=0.018$ , Fig 1B), but not in tau-N ( $\rho_{\text{Spearman}}=0.7$ ,  $p=0.087$ , not shown). No significant correlation was found between the average relative gamma power and the global amyloid burden in neither group (not shown).

**3.2 Gamma oscillations are increased in frontal and parietal electrodes.** Tau-P showed higher gamma power in than in tau-N patients in frontal and parietal electrodes (Fp2, Fz, F3, F4, F7, Cz, C3, C4, Pz, P3, P4, P7, P8, P9, P10,  $p=.009$ , Fig 1C). Moreover, in tau-P patients, a positive linear correlation between relative gamma power and local SUVR was found at the parietal electrodes

( $\rho_{\text{Pearson}}=0.93$ ,  $p=0.03$  and for P3 and  $\rho_{\text{Pearson}}=0.95$ ,  $p=0.016$  for P4 respectively). No difference is found for the other frequency bands between the tau-positive and tau-negative patients.

#### 4. Discussion

EEG alterations have been observed in a large cohort of preclinical AD patients (Gaubert et al. 2019), advancing the hypothesis of complex compensatory mechanisms. Here, we found that gamma oscillations are increased in tau positive patients. We also find a positive linear correlation between relative gamma power and tau ( $\rho=.79$ ,  $p=.0005$ ), while no correlation was found in other frequency bands nor for amyloid, suggesting a certain specificity of gamma oscillations with tau-related neurodegeneration. Interestingly, gamma oscillations also locally correlate with tau in parietal electrodes. These overlie the parietal and the precuneus cortices, which are known to show early tau-driven neurodegeneration in the course of AD (Frontzkowski et al. 2022). Tau protein accumulation is known to promote network hyperexcitability and in an AD murine model its reduction resulted in a decreased hyperexcitability, independently from the presence of A $\beta$ 42 (Tok, Ahnaou, and Drinkenburg 2022). Moreover, a recent study in AD patients found a positive linear correlation between the amplitude of the TMS-evoked potential (TEP) at the level of the posterior parietal cortex and the levels of tau and p-tau in CSF (Casula et al. 2022). Hence, we hypothesize that the presence of tau protein and neurodegeneration could locally disrupt of the physiological rhythms, forcing the remaining neurons to increase their activity, to maintain the excitatory/inhibitory balance. Among the main limitations of this study, except the small sample size due to its retrospective and exploratory nature, we acknowledge the imbalance in sex between tau-P and tau-N, which might have biased some of the analyses, even though to our knowledge gamma oscillations are not known to be influenced by sex. The lower cognitive scores of tau-P patients on Mini Mental State Examination are in line with increased rate of neurodegeneration expected for these patients. In this view, further longitudinal studies in larger, balanced and age-matched cohorts employing high-density EEG will be crucial to determine the value of gamma oscillations to assess cortical tau deposition.

**Funding and conflicts of interests:** The Centre de la mémoire is funded by the following private donors under the supervision of the Private Foundation of Geneva University Hospitals: A.P.R.A. - Association Suisse pour la Recherche sur la Maladie d'Alzheimer, Genève; Fondation Segré, Genève; Race Against Dementia Foundation, London, UK; Fondation Child Care, Genève; Fondation Edmond J. Safra, Genève; Fondation Minkoff, Genève; Fondazione Augusta, Lugano; McCall Macbain Foundation, Canada; Nicole et René Keller, Genève; Fondation AETAS, Genève. The work of IR has been supported by the Swiss National Science Foundation (SNSF) grant no. 192749 and CRSII5\_209470 awarded to SV. MS and SV are scientific advisors and shareholders of Epilog NV, Ghent. MS was supported by the Swiss National Science Foundation project 180365. VG was supported by the Swiss National Science Foundation (projects 320030\_169876, 320030\_185028 and IZSEZ0\_188355), by the Velux foundation (project 1123), by the Schmidheiny foundation, and by the Aetas foundation. VG received financial support for research and/or speaker fees through her institution from Siemens Healthineers, GE Healthcare, Life Molecular Imaging, Cerveau Technologies, Novo Nordisk, Roche, Merck.

## Bibliography

- Anon. 2021. *2021 Alzheimer's Disease Facts and Figures*. Vol. 17. doi: 10.1002/alz.12328.
- Cammoun, Leila, Xavier Gigandet, Djalel Meskaldji, Jean Philippe Thiran, Olaf Sporns, Kim Q. Do, Philippe Maeder, Reto Meuli, and Patric Hagmann. 2012. "Mapping the Human Connectome at Multiple Scales with Diffusion Spectrum MRI." *Journal of Neuroscience Methods* 203(2):386–97. doi: 10.1016/j.jneumeth.2011.09.031.
- Casula, Elias P., Iliaria Borghi, Michele Maiella, Maria C. Pellicciari, Sonia Bonni, Lucia Mencarelli, Martina Assogna, Alessia D'Acunto, Francesco Di Lorenzo, Danny A. Spampinato, Emiliano Santarnecchi, Alessandro Martorana, and Giacomo Koch. 2022. "Regional Precuneus Cortical Hyperexcitability in Alzheimer's Disease Patients." *Annals of Neurology* 371–83. doi: 10.1002/ana.26514.
- Digma, Leonardino A., John R. Madsen, Emilie T. Reas, Anders M. Dale, James B. Brewer, and Sarah J. Banks. 2019. "Tau and Atrophy: Domain-Specific Relationships with Cognition." *Alzheimer's Research and Therapy* 11(1):1–12. doi: 10.1186/s13195-019-0518-8.
- Fleisher, Adam S., Michael J. Pontecorvo, Michael D. Devous, Ming Lu, Anupa K. Arora, Stephen P. Truocchio, Patricia Aldea, Matthew Flitter, Tricia Locascio, Marybeth Devine, Andrew Siderowf, Thomas G. Beach, Thomas J. Montine, Geidy E. Serrano, Craig Curtis, Allison Perrin, Stephen Salloway, Misty Daniel, Charles Wellman, Abhinay D. Joshi, David J. Irwin, Val J. Lowe, William W. Seeley, Milos D. Ikonovic, Joseph C. Masdeu, Ian Kennedy, Thomas Harris, Michael Navitsky, Sudeepti Southekal, and Mark A. Mintun. 2020. "Positron Emission Tomography Imaging with [<sup>18</sup>F]Flortaucipir and Postmortem Assessment of Alzheimer Disease Neuropathologic Changes." *JAMA Neurology* 77(7):829–39. doi: 10.1001/jamaneurol.2020.0528.
- Frontzkowski, Lukas, Michael Ewers, Matthias Brendel, Davina Biel, Rik Ossenkuppele, Paul Hager, Anna Steward, Anna Dewenter, Sebastian Römer, Anna Rubinski, Katharina Buerger, Daniel Janowitz, Alexa Pichet Binette, Ruben Smith, Olof Strandberg, Niklas Mattsson Carlgren, Martin Dichgans, Oskar Hansson, and Nicolai

- Franzmeier. 2022. "Earlier Alzheimer's Disease Onset Is Associated with Tau Pathology in Brain Hub Regions and Facilitated Tau Spreading." *Nature Communications* 13(1). doi: 10.1038/s41467-022-32592-7.
- Gaubert, Sinead, Federico Raimondo, Marion Houot, Marie Constance Corsi, Lionel Naccache, Jacobo Diego Sitt, Bertrand Hermann, Delphine Oudiette, Geoffroy Gagliardi, Marie Odile Habert, Bruno Dubois, Fabrizio De Vico Fallani, Hovagim Bakardjian, and Stéphane Epelbaum. 2019a. "EEG Evidence of Compensatory Mechanisms in Preclinical Alzheimer's Disease." *Brain* 142(7):2096–2112. doi: 10.1093/brain/awz150.
- Hagmann, Patric, Leila Cammoun, Xavier Gigandet, Reto Meuli, Christopher J. Honey, J. Van Welden, and Olaf Sporns. 2008. "Mapping the Structural Core of Human Cerebral Cortex." *PLoS Biology* 6(7):1479–93. doi: 10.1371/journal.pbio.0060159.
- Mishra, Shruti, Brian A. Gordon, Yi Su, Jon Christensen, Karl Friedrichsen, Kelley Jackson, Russ Hornbeck, David A. Balota, Nigel J. Cairns, John C. Morris, Beau M. Ances, and Tammie L. S. Benzinger. 2017. "AV-1451 PET Imaging of Tau Pathology in Preclinical Alzheimer Disease: Defining a Summary Measure." *NeuroImage* 161(June):171–78. doi: 10.1016/j.neuroimage.2017.07.050.
- Okamoto, Masako, Haruka Dan, Kuniko Sakamoto, Kazuhiro Takeo, Koji Shimizu, Satoru Kohno, Ichiro Oda, Seiichiro Isoke, Tateo Suzuki, Kaoru Kohyama, and Ippeita Dan. 2004. "Three-Dimensional Probabilistic Anatomical Cranio-Cerebral Correlation via the International 10-20 System Oriented for Transcranial Functional Brain Mapping." *NeuroImage* 21(1):99–111. doi: 10.1016/j.neuroimage.2003.08.026.
- Oostenveld, Robert, Pascal Fries, Eric Maris, and Jan Mathijs Schoffelen. 2011. "FieldTrip: Open Source Software for Advanced Analysis of MEG, EEG, and Invasive Electrophysiological Data." *Computational Intelligence and Neuroscience* 2011. doi: 10.1155/2011/156869.
- Palop, Jorge J., and Lennart Mucke. 2016. "Network Abnormalities and Interneuron Dysfunction in Alzheimer Disease." *Nature Reviews Neuroscience* 17(12):777–92. doi: 10.1038/nrn.2016.141.Network.
- Pontecorvo, Michael J., Michael D. Devous, Michael Navitsky, Ming Lu, Stephen Salloway, Frederick W. Schaerf, Danna Jennings, Anupa K. Arora, Anne McGeehan, Nathaniel C. Lim, Hui Xiong, Abhinay D. Joshi, Andrew Siderowf, and Mark A. Mintun. 2017. "Relationships between Flortaucipir PET Tau Binding and Amyloid Burden, Clinical Diagnosis, Age and Cognition." *Brain* 140(3):748–63. doi: 10.1093/brain/aww334.
- Raichle, Marcus E. 2015. "The Brain's Default Mode Network." *Annual Review of Neuroscience* 38:433–47. doi: 10.1146/annurev-neuro-071013-014030.
- Tok, Sean, Abdallah Ahnaou, and Wilhelmus Drinkenburg. 2022. "Functional Neurophysiological Biomarkers of Early-Stage Alzheimer's Disease: A Perspective of Network Hyperexcitability in Disease Progression." *Journal of Alzheimer's Disease* 88(3):809–36. doi: 10.3233/JAD-210397.
- Verret, Laure, Edward O. Mann, Giao B. Hang, Albert M. I. Barth, Inma Cobos, Kaitlyn Ho, Nino Devidze, Eliezer Masliah, Anatol C. Kreitzer, Istvan Mody, Lennart Mucke, and Jorge J. Palop. 2012. "Inhibitory Interneuron Deficit Links Altered Network Activity and Cognitive Dysfunction in Alzheimer Model." *Cell* 149(3):708–21. doi: 10.1016/j.cell.2012.02.046.
- Wang, Jing, Yuxing Fang, Xiao Wang, Huichao Yang, Xin Yu, and Huali Wang. 2017a. "Enhanced Gamma Activity and Cross-Frequency Interaction of Resting-State Electroencephalographic Oscillations in Patients with Alzheimer's Disease." *Frontiers in Aging Neuroscience* 9(JUL):1–7. doi: 10.3389/fnagi.2017.00243.

## Tables and Figures

|                               | <b>Tau negative (N=9)</b> | <b>Tau positive (N=7)</b> | <b>p-value</b> |
|-------------------------------|---------------------------|---------------------------|----------------|
| <b>Age, years</b>             | 73 [70-76]                | 71 [69-72.5]              | 0.339          |
| <b>Gender (female), n (%)</b> | 1(11%)                    | 7(100%)                   | <b>0.002</b>   |
| <b>Education, years</b>       | 14 [11-16]                | 12 [11.5-16.5]            | 0.957          |

|                                       |                 |                 |              |
|---------------------------------------|-----------------|-----------------|--------------|
|                                       |                 |                 |              |
| <b>Clinical dementia rating scale</b> | 0.5 [0-1]       | 1 [0.75-1]      | 0.094        |
| <b>Mini mental state examination</b>  | 27 [26-29]      | 23 [20-24]      | <b>0.014</b> |
| <b>Amyloid positivity, n (%)</b>      | 1 (11%)         | 7 (100%)        | <b>0.002</b> |
| <b>2-sec EEG epochs retained</b>      | 281 [260 - 292] | 265 [230 - 295] | 0.758        |

**Table 1: Patients' characteristics and summary.** Summary of patient demographic and clinical data. Significant values are highlighted in bold. Summary results are reported as median values [inter-quartile range].

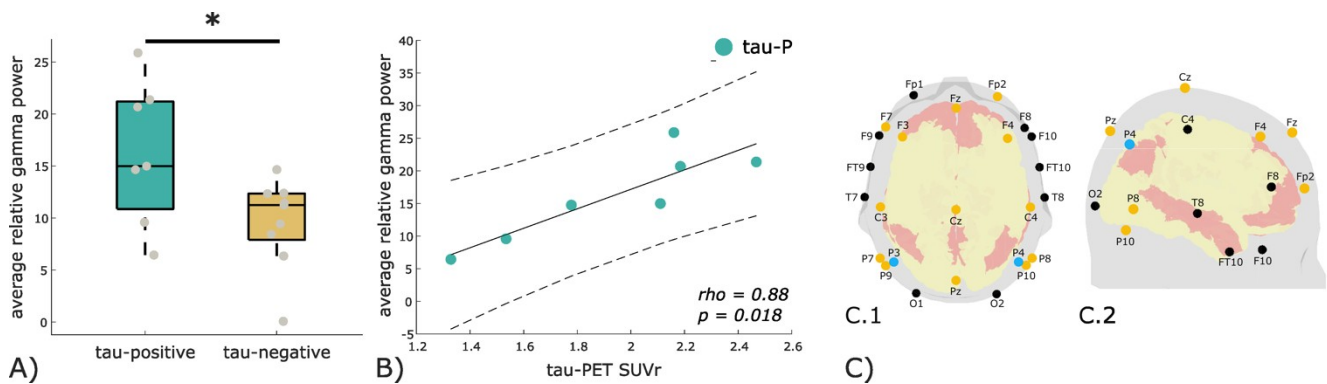

**Figure 1: Gamma power in tau-positive and tau-negative patients.** A) Boxplot of the average relative gamma power (30-98 Hz) in tau-positive and tau-negative patients. The asterisk indicates statistical significance ( $p < .05$ ). B) Scatterplot of Pearson correlation between the global tau-PET SUVR and the average gamma power in tau-P patients. C.1) and C.2)) Maps of EEG electrodes (dots) plotted in axial (1) and right lateral sagittal (2) views of the scalp and brain. Yellow dots indicate electrodes that belong to the significant cluster ( $p < .01$ ). Blue dots indicate the electrodes where local gamma power linearly correlated with local SUVR. Pink areas in are cortical regions belonging to the default mode network (DMN) as previously described (Raichle 2015) adapted to the scale 2 Lausanne parcellation scheme (Cammoun et al. 2012; Hagmann et al. 2008).
